# Supplementary material
Source: PubMed Central journal article supplement (PMC7438308)
Supplement: NIHMS1609151-supplement-2.pdf [file NIHMS1609151-supplement-2.pdf]

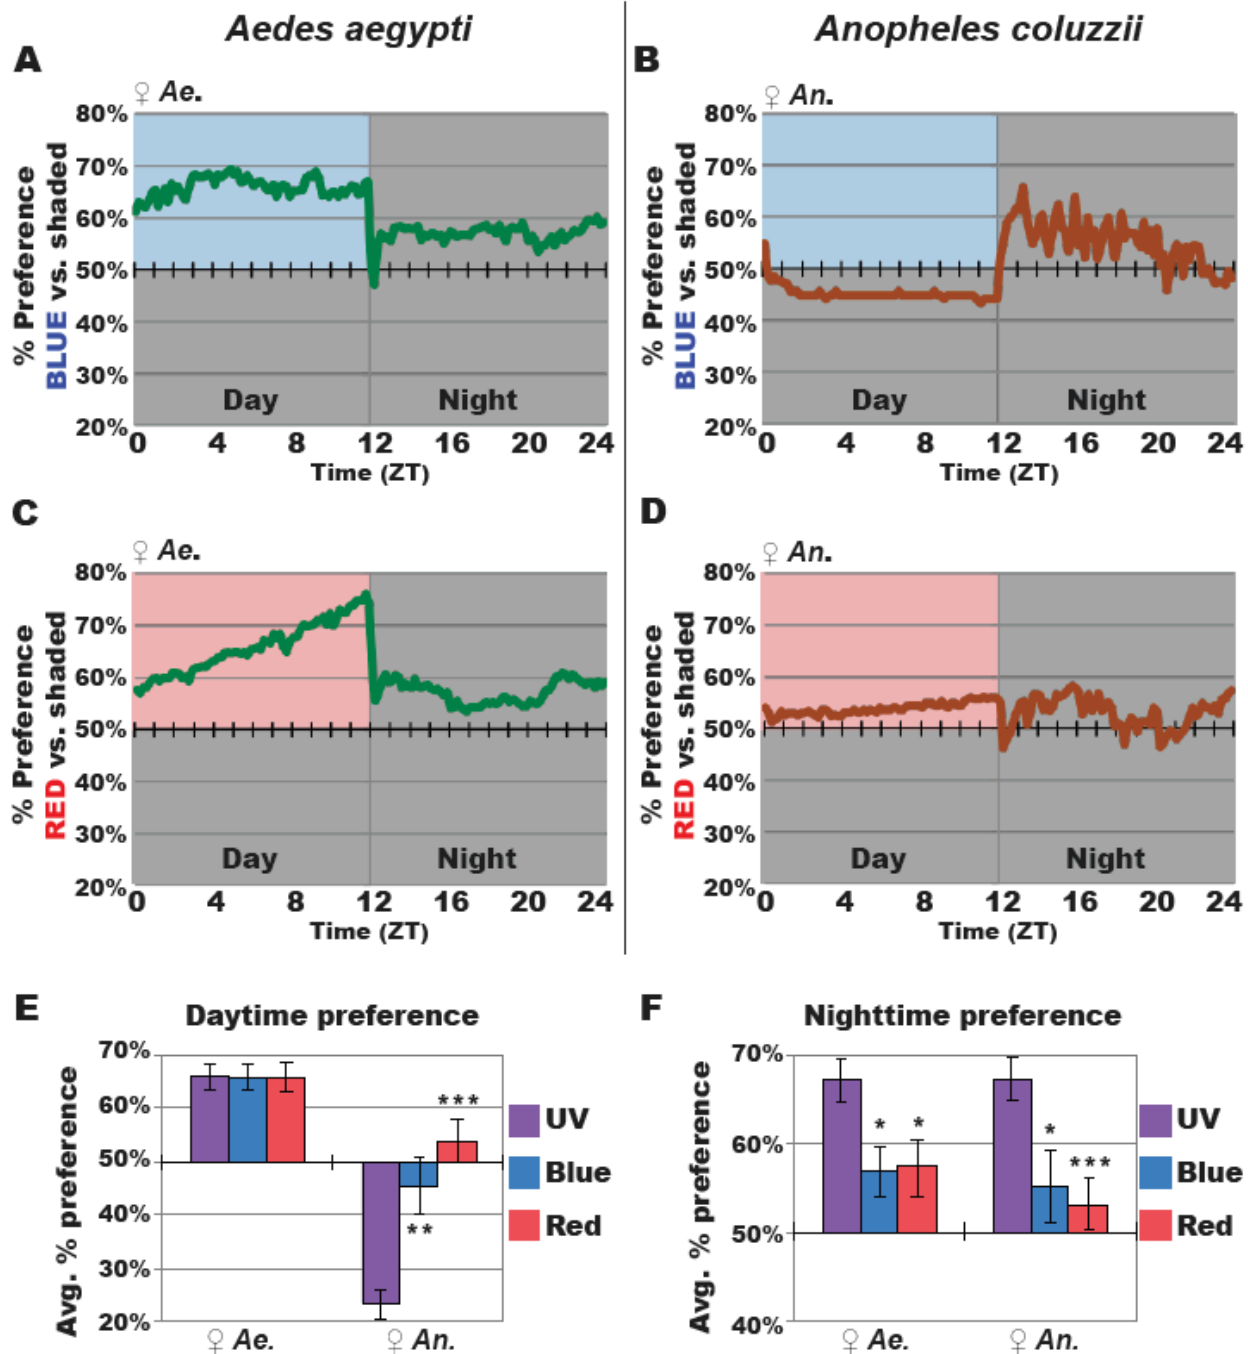

**Figure S1. Mosquito light-evoked attraction/avoidance behavior is wavelength-specific, Related to Figure 1.**

(A-B) Attraction/avoidance behavior to blue light (450 nm LED, 400  $\mu\text{W}/\text{cm}^2$ ), measured by % preference in blue light-exposed versus shaded environment throughout 12 hr: 12 hr blue light: dark for female (A) *Ae. aegypti* (n=78) and (B) *An. coluzzii* (n=34).

**(C-D)** Attraction/avoidance behavior to red light (620 nm LED, 400  $\mu\text{W}/\text{cm}^2$ ), measured by % preference in red light-exposed versus shaded environment throughout 12hr: 12hr red light:dark for female **(C)** *Ae. aegypti* (n=62) and **(D)** *An. coluzzii* (n=52).

**(E-F)** Average attraction/avoidance behavioral preference to light-exposed (UV, blue and red) versus shaded-environment for **(E)** daytime and **(F)** nighttime in *Ae. aegypti* and *An. coluzzii* female mosquitoes. Data are represented as mean  $\pm$  S.E.M. \*p < 0.05; \*\*p < 0.01; \*\*\*p < 0.001 vs. UV.

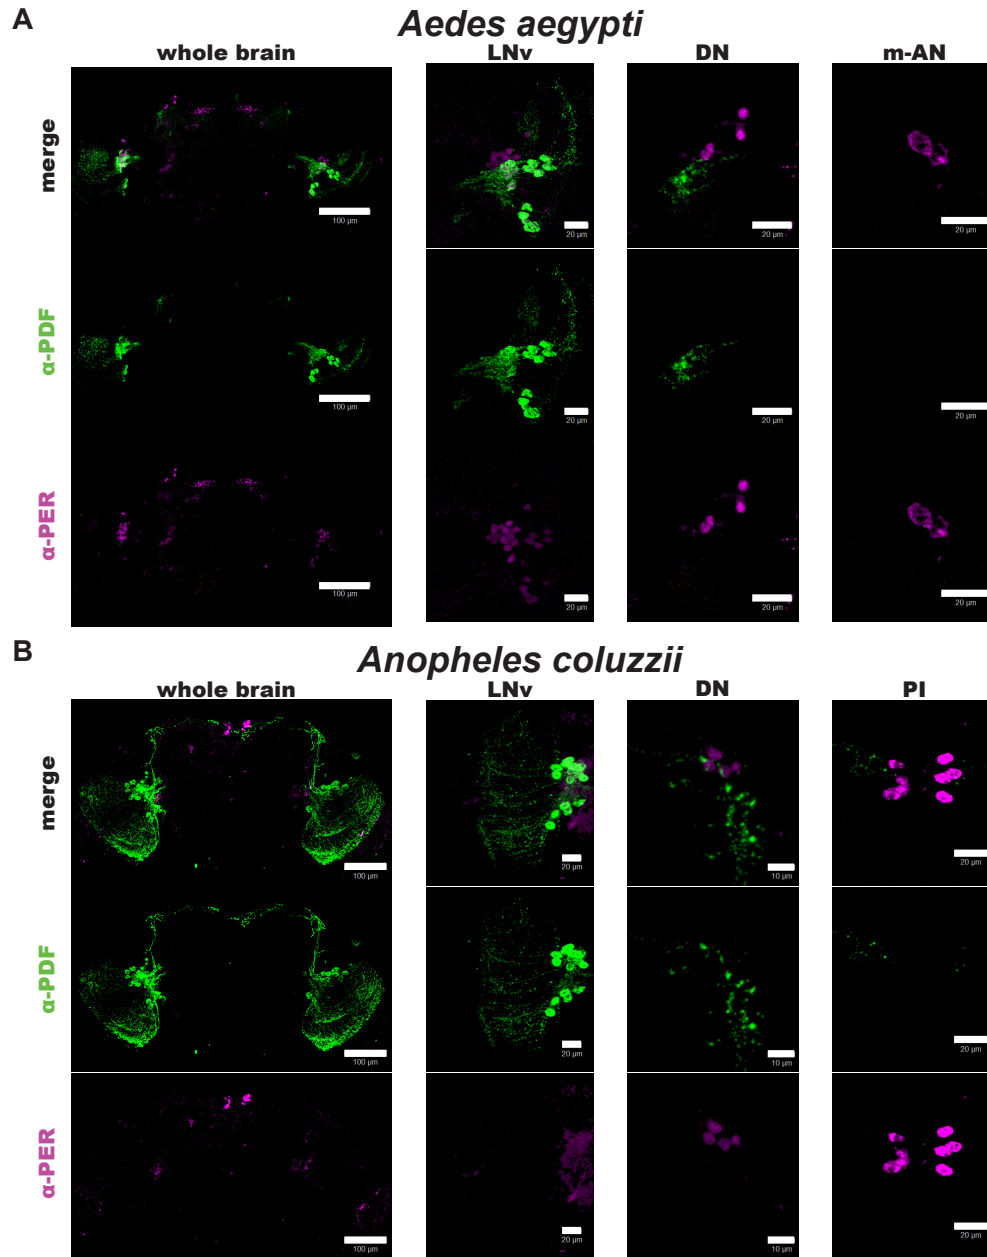

**Figure S2. Circadian neuronal circuit of diurnal and nocturnal mosquito brains, Related to Figure 2, Figure 3 and Figure 4.**

**(A-B)** Representative confocal images of adult female **(A)** *Ae. aegypti* and **(B)** *An. coluzzii* mosquito brains immunocytochemistry stained with  $\alpha$ -PER (magenta) and  $\alpha$ -PDF (green) antibodies. Similar to *Drosophila*, neurites from PDF<sup>+</sup> LNv neurons project dorsally towards the DNs in *Ae. aegypti*. In *An. coluzzii* brains, PDF<sup>+</sup> LNv neurites project

dorsally towards to the DNs and then extend medially towards the PER<sup>+</sup> PI neurons.

\*Scale bars indicate 100μm for whole brains, 10μm for *An. coluzzii* DN, and 20μm all others.

## *Aedes aegypti*

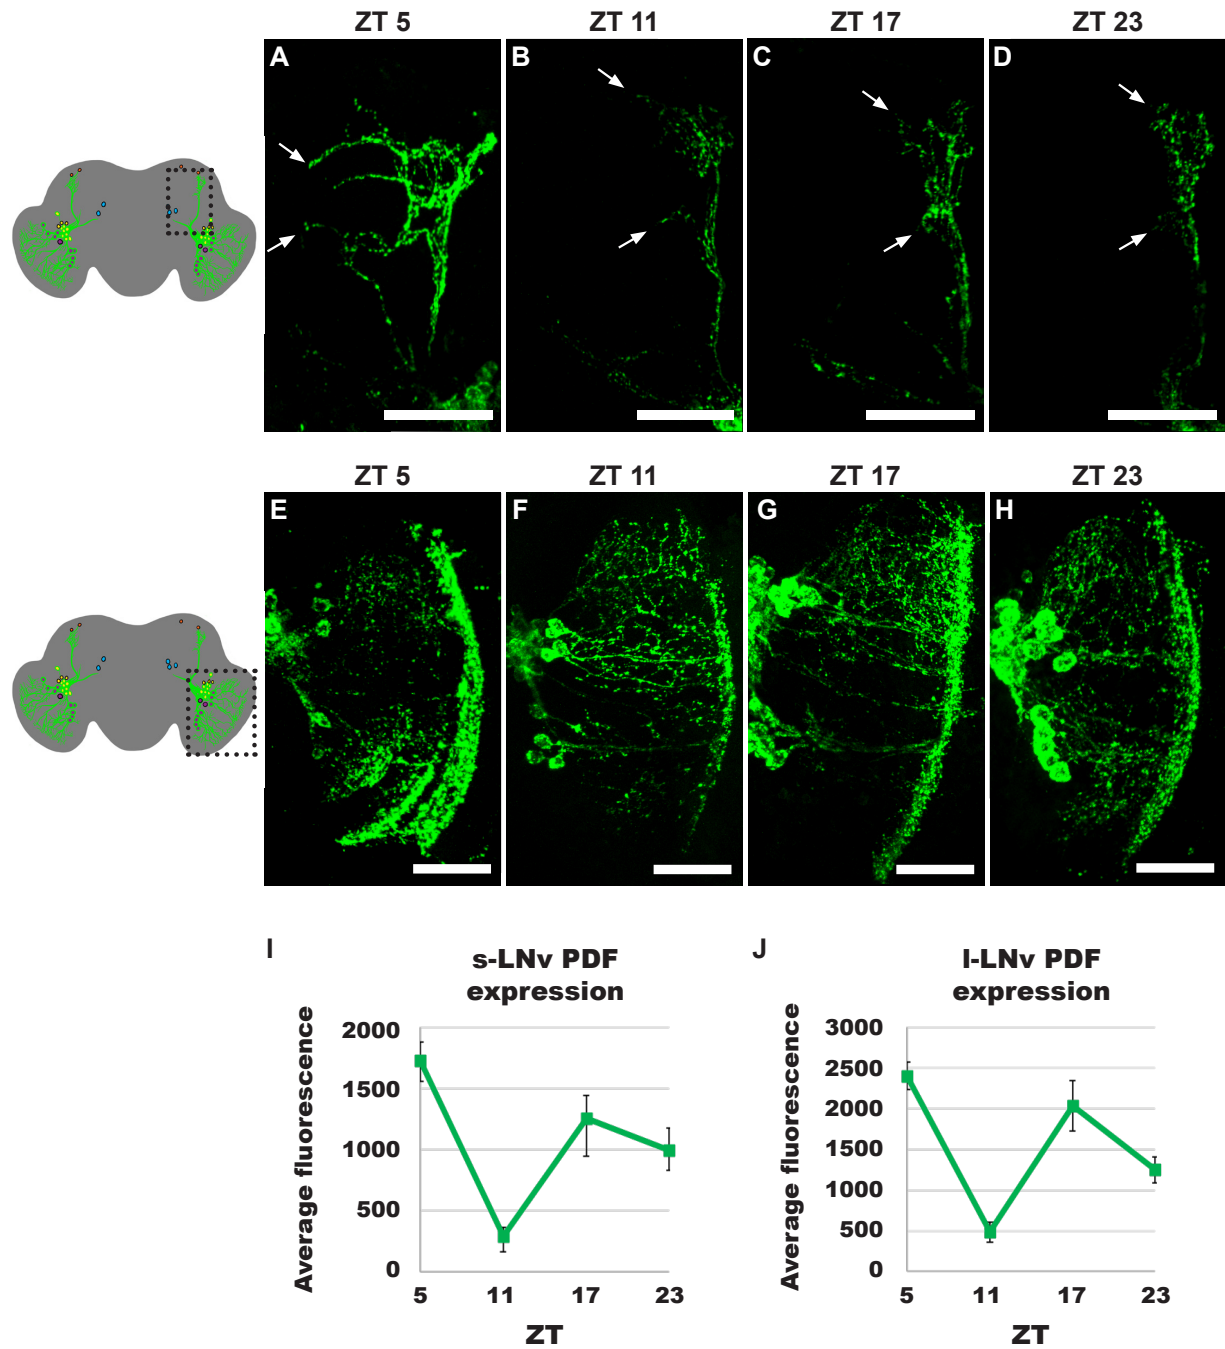

Figure S3. PDF<sup>+</sup> neurons and in *Aedes aegypti* female brains, Related to Figure 2 and Figure 3.

(A-D) Representative confocal images of adult female *Ae. aegypti* brains immunocytochemistry stained with  $\alpha$ -PDF (green) antibody, zoomed in on LNV dorsal

projections at **(A)** ZT5, **(B)** ZT11, **(C)** ZT17, and **(D)** ZT23. White arrows indicate the ends of LNV neuronal arbors. These images were enhanced for intensity and contrast to better show the ends of the arbors. \*Scale bars indicate 50  $\mu\text{m}$ .

**(E-H)** Representative confocal images of adult female *Ae. aegypti* brains immunocytochemistry stained with  $\alpha$ -PDF (green) antibody, zoomed in on an optic lobe at **(E)** ZT5, **(F)** ZT11, **(G)** ZT17, and **(H)** ZT23. These images were enhanced for intensity and contrast to better show the ends of the arbors. \*Scale bars indicate 50  $\mu\text{m}$ .

**(I-J)** PDF expression levels over 24 hrs time for *Ae. aegypti* (ZT5, n=27; ZT11, n=17; ZT17, n=6, ZT23, n=7) **(I)** s-LNV and **(J)** l-LNV. Data are represented as mean  $\pm$  S.E.M.

*Anopheles coluzzii*

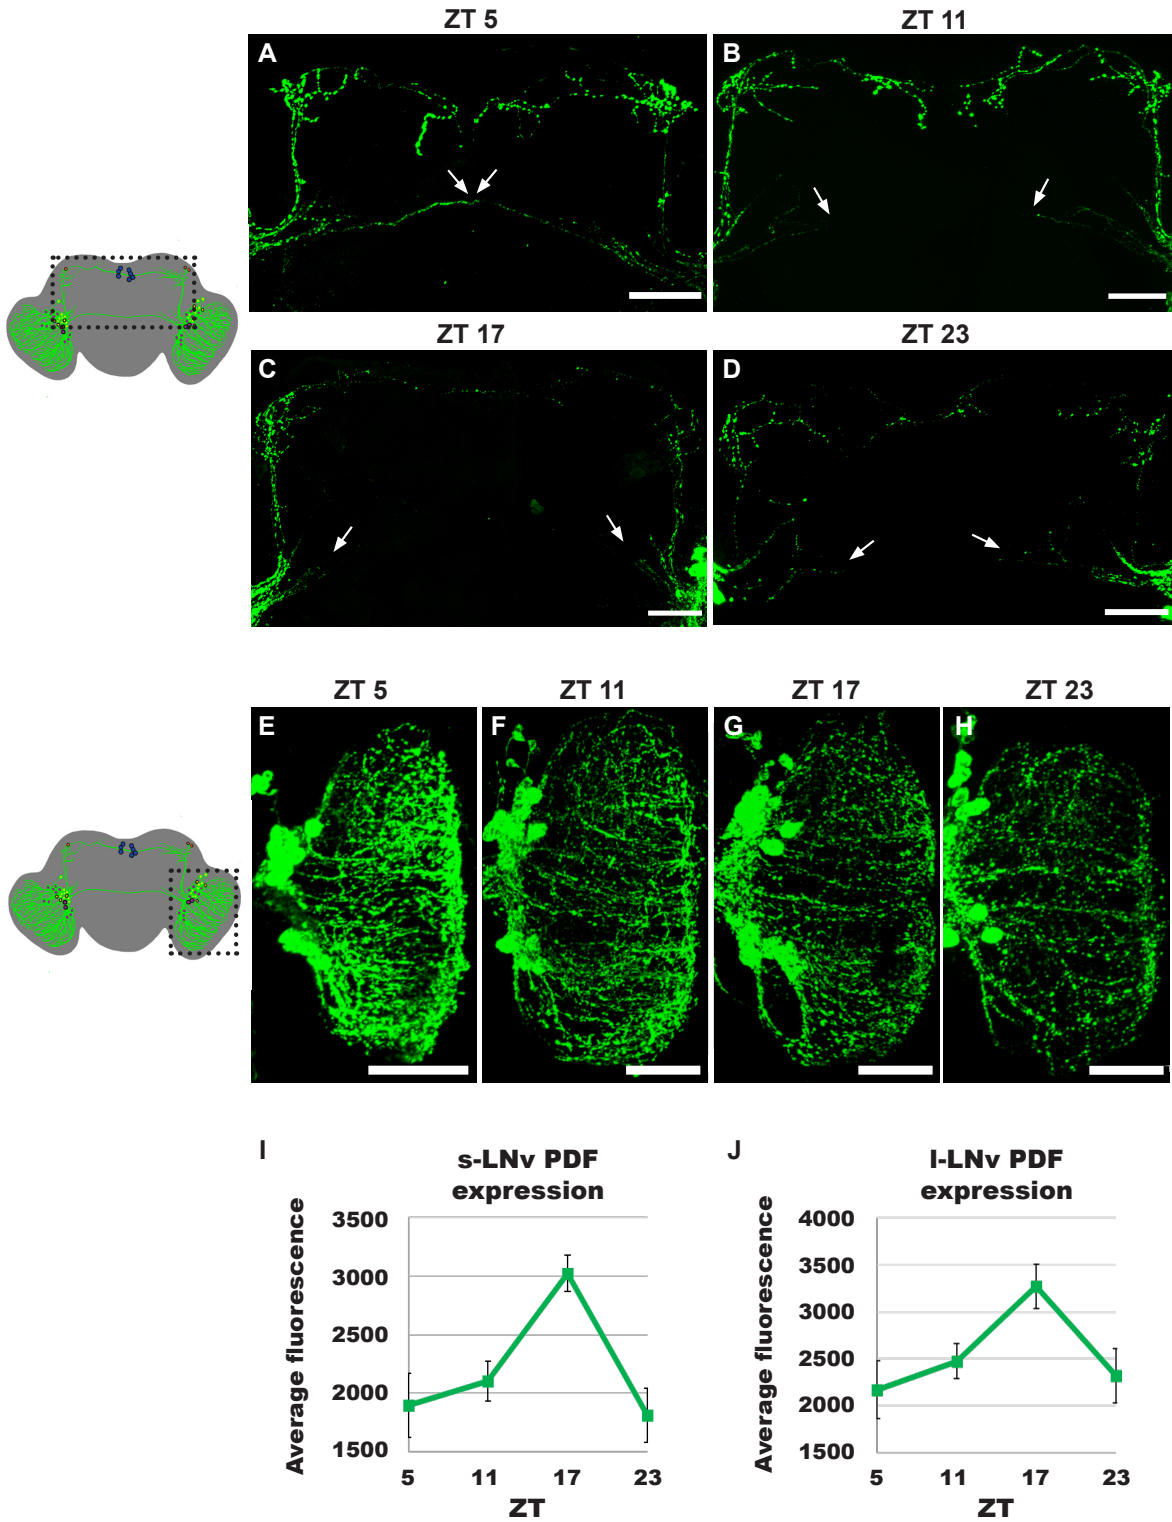

Figure S4. PDF+ neurons and in *Anopheles coluzzii* female brains, Related to Figure 2 and Figure 3.

**(A-D)** Representative confocal images of adult female *An. coluzzii* brains immunocytochemistry stained with  $\alpha$ -PDF (green) antibody, zoomed in on LNV dorsal projections at **(A)** ZT5, **(B)** ZT11, **(C)** ZT17, and **(D)** ZT23. White arrows indicate the ends of LNV neuronal arbors. These images were enhanced for intensity and contrast to better show the ends of the arbors. \*Scale bars indicate 50  $\mu$ m.

**(E-H)** Representative confocal images of adult female *An. coluzzii* brains immunocytochemistry stained with  $\alpha$ -PDF (green) antibody, zoomed in on an optic lobe at **(E)** ZT5, **(F)** ZT11, **(G)** ZT17, and **(H)** ZT23. These images were enhanced for intensity and contrast to better show the ends of the arbors. \*Scale bars indicate 50  $\mu$ m.

**(I-J)** PDF expression levels over 24 hrs time for *An. coluzzii* (ZT5, n=13; ZT11, n=31; ZT17, n=9, ZT23, n=8) **(I)** s-LNV, and **(J)** l-LNV. Data are represented as mean  $\pm$  S.E.M.



|                           | <i>Avg. number of neurons per hemisphere</i> |                           |                           |                           | <i>Avg. number of neurons per brain</i> |                      |                      |
|---------------------------|----------------------------------------------|---------------------------|---------------------------|---------------------------|-----------------------------------------|----------------------|----------------------|
|                           | PDF <sup>+</sup><br>I-LNv                    | PDF <sup>+</sup><br>s-LNv | PDF <sup>-</sup><br>I-LNv | PDF <sup>-</sup><br>s-LNv | DNs                                     | PI<br>Neurons        | m-ANs                |
| <i>Aedes aegypti</i>      | 8.6 ± 0.4<br>(n= 18)                         | 9.3 ± 0.5<br>(n= 18)      | 3.1 ± 0.4<br>(n= 19)      | 5.8 ± 1.1<br>(n= 19)      | 4.1 ± 0.3<br>(n= 30)                    | -                    | 4.8 ± 0.4<br>(n= 31) |
| <i>Anopheles coluzzii</i> | 10 ± 0.5<br>(n= 20)                          | 9.8 ± 0.5<br>(n= 21)      | 3.5 ± 0.7<br>(n= 8)       | 5.2 ± 0.8<br>(n= 8)       | 3.3 ± 0.4<br>(n= 26)                    | 7.3 ± 0.1<br>(n= 22) | -                    |

**Table S1. Average number of PERIOD-expressing neurons, Related to Figure 2.**

Average number of PERIOD-expressing neurons ±SEM (n= #) in *Ae. aegypti* and *An. coluzzii* female brains, per hemisphere for PDF<sup>+</sup> or PDF<sup>-</sup> large- and small-LNvs, and per whole brain for DNs, m-ANs, and PI neurons. Female *Ae. aegypti* brains have approximately 8-9 PDF<sup>+</sup> I-LNvs and 9-10 PDF<sup>+</sup>s-LNvs, while female *An. coluzzii* brains have approximately 10 PDF<sup>+</sup> I-LNvs and 9-10 PDF<sup>+</sup> s-LNvs per hemisphere. Both species of mosquitoes have larger number of LNvs compared to *Drosophila melanogaster*, which has 5-6 I-LNvs and 4-5 PDF<sup>+</sup> s-LNvs, but otherwise their neuroanatomical features are highly similar to *Drosophila melanogaster* and other insects. In the lateral ventral region amongst the LNv, there are PER<sup>+</sup>/PDF<sup>-</sup> neurons, again, consistent with a PER<sup>+</sup>/PDF<sup>-</sup> “5<sup>th</sup> s-LNv” neuron seen in flies. We find approximately 3 PDF<sup>-</sup> putative I-LNvs and 6 PDF<sup>-</sup> putative s-LNvs in female *Ae. aegypti*, and approximately 3-4 PDF<sup>-</sup> putative I-LNvs and 4-6 PDF<sup>-</sup> putative s-LNvs in female *An. coluzzii* in each side of the brain.
